21 analysis; J.R. did ITC experiments; N.A.E., Y.L. and J.R. did the RNA-Tau *in vitro* droplet  
22 formation; N.A.E. did EPR and DEER experiments; I.H. did sarkosyl fractionation; Y.L. and  
23 H.Z., contributed to manuscript preparation; X.Z., K.S.K. and S.H. wrote the manuscript.

24

## 25 Abstract

26 Non-membrane bound organelles that behave like liquid droplets are widespread among  
27 eukaryotic cells. Their dysregulation appears to be a critical step in several neurodegenerative  
28 conditions. Here we report that Tau protein, the primary constituent of Alzheimer neurofibrillary  
29 tangles, can form liquid droplets and therefore has the necessary biophysical properties to  
30 undergo a liquid-liquid phase separation (LLPS) in cells. Consonant with the factors that induce  
31 LLPS, Tau is an intrinsically disordered protein that electrostatically complexes with RNA to  
32 form droplets that can be tuned by salt concentration and temperature and exhibit low interfacial  
33 tension. Uniquely, the pool of RNAs to which Tau binds in living cells are tRNAs. This phase  
34 state of Tau is held in 1:1 charge balance across large blocks of the protein and the nucleic acid  
35 and forms optimal complexes at multiple RNA:Tau mass ratios. These features define a complex  
36 co-acervate in which undergo free diffusion in their interior, despite the high concentration of  
37 protein, and rapid exchange with their exterior environment. Counter to most closely packed  
38 protein assemblies, the condensed phase state of Tau is not associated with changes in local Tau  
39 conformations as verified by distance measurements across a pair of spin labels by pulsed dipolar  
40 spectroscopy. In contrast, fibrillar states of Tau are accompanied by large changes in local Tau  
41 conformations. Importantly, prolonged residency within a droplet results in the emergence of  
42 detectable beta-structure by thioflavin labeling, suggesting that the droplet state can incubate Tau  
43 and pre-dispose it toward beta sheet structures typical of insoluble Tau fibrils.

44

## 45 Introduction

46 Inclusions consisting of the Tau protein occur in many neurological conditions with  
47 Alzheimer's disease the most prominent among them. Normally, Tau is in a kinetic equilibrium  
48 between a microtubule bound and free state. Under disease conditions Tau self-assembles into  
49 fibrils that eventually lead to highly insoluble polymeric inclusions known as neurofibrillary  
50 tangles. The underlying biophysical basis for the transition of Tau from a microtubule-associated  
51 protein to an insoluble fibril is unknown. However, a clue comes from the observation that  
52 polyanions, such as heparin, promote Tau fibrillization [1]. Although less effectively, RNA can  
53 also induce Tau fibrillization [2, 3], and unlike heparin, RNA is present intracellularly, making it  
54 accessible to interact with Tau.

55 Our experiments began with the finding that Tau can bind RNA in living cells and  
56 interestingly Tau-RNA binding shows selectivity for tRNAs. This observation along with the  
57 known categorization of Tau as intrinsically disordered and its ability to spread from cell to cell  
58 in a manner that resembles prions [4, 5], suggested that Tau might share additional properties  
59 with other RNA binding proteins involved in neurodegeneration. These proteins include FUS [6],  
60 TDP-43 [7], C9ORF72 [8, 9], hnRNPA2B1 and hnRNPA1 [10, 11] all of which can undergo  
61 liquid-liquid phase-separation from the surrounding aqueous medium into droplets *in vitro*.  
62 These highly protein dense structures, known in the chemical literature as complex coacervates  
63 [12, 13], establish a liquid liquid phase state (LLPS) associated with (1) increasing protein  
64 concentration, (2) tuning the salt concentration and temperature, (3) the presence of RNA  
65 complexed to an intrinsically disordered protein and (4) low interfacial tension to promote fusion.  
66 A consensus property of a complex coacervate is high internal fluid dynamics rooted in low

67 cohesive energy between the polyelectrolyte complexes and weakly bound water constituting the  
68 fluid [13, 14]. Complex coacervate chemistry has facilitated bio-inspired coating, wet adhesion  
69 and engulfment [15-17].

70 Here we show that Tau-RNA complexes have all the properties of a complex coacervate.  
71 When multiple Tau molecules weakly bind RNA and overall charge matching is achieved  
72 between the polycation, Tau, and polyanion, RNA, Tau undergoes condensation and phase  
73 separation into micrometer sized droplets. Remarkably, within this liquid phase-separated state  
74 Tau maintains internal segment mobility and a compact conformation between two spin labels  
75 around the core region of Tau known as PHF6(\*) despite the molecular crowding associated with  
76 coacervation. In contrast, this region undergoes irreversible fibrillization in the presence of a  
77 different polyanion, heparin, which induces full extension of Tau monomers and packs  
78 monomers into  $\beta$ -sheet assemblies. The spontaneous and reversible droplet formation suggests  
79 that Tau is held in a low energy-barrier fluid state between dilute solution and complex  
80 coacervate condensate with the free energy difference toggled by interactions mediated by ions.  
81 However, prolonged residence in this phase state begins to induce  $\beta$ -sheet formation suggesting  
82 that the highly condensed phase state of Tau is a precursor to fibril formation.

83

## 84 Results

### 85 **Tau binds RNA in living cells**

86 RNA binding to Tau in living cells was examined by PAR-iCLIP using the human Tau-  
87 specific antibody, HJ 8.5, in HEK 293T cells, human iPSC-derived neurons and retinoic acid-  
88 differentiated neuroblastoma SH-SY5Y cells. The HEK 293T cells expressed wild type full-  
89 length human Tau (4R2N), mutant Tau (P301L-4R2N) or mutant Tau fused to CFP (P301L,

90 4R1N) (Fig. 1a-b, Fig. S1, Fig. S2a-c). iPSC-derived neurons were derived from carriers of  
91 4R2N Tau (Fig. 1c), P301L Tau or a risk variant for progressive supranuclear palsy, A152T. The  
92 SH-SY5Y cells expressed both Tau and the short isoform of MAP2 called MAP2c [18] (Fig.  
93 S2d). Strong binding of Tau to RNA was observed in all cells, as indicated by <sup>32</sup>P-labeled RNA  
94 bands corresponding to immunoprecipitated and cross-linked Tau-RNA complexes (Fig. 1a-c,  
95 lanes 2; Fig. S2a, lane 2). The radioactive Tau-bound RNA band was found to run as 30-100 nt  
96 (data not shown). PAR-iCLIP experiments with varying RNase concentrations did not shift the  
97 <sup>32</sup>P-labeled band, nor change its intensity (lanes 2-3 in Fig. S2b). These experiments indicate that  
98 in contrast to most known RNA-binding proteins that bind to RNA as a smear over a range of  
99 sizes, Tau binds specifically and dominantly to small RNAs or RNA fragments.

100         Because small RNAs are abundant and may engage in non-specific interactions, we  
101 performed multiple confirmatory controls (Fig. S2b lanes 1, 4 and S2c lanes 3, 4), including  
102 immunoprecipitation in HEK cells without Tau expression, without Tau antibody to rule out non-  
103 specific binding and without UV exposure to eliminate the possibility that Tau-RNA complexes  
104 formed *in vitro* after cell lysis. Various disease mutations of Tau had no effect on the binding to  
105 RNA in either the HEK cells or the human iPSC-derived neurons. Although Tau and MAP2 are  
106 highly homologous in their proline rich and microtubule binding domains, MAP2 did not bind  
107 RNA (Fig. S2d, lane 3).

108         To identify the RNA types crosslinked to Tau, DNA libraries were prepared from the  
109 immunoprecipitated radiolabeled bands and sequenced. In all experiments, the controls  
110 consistently showed relatively few total reads and very few uniquely aligned reads (Fig. S2e-f).  
111 We analyzed the distribution of Tau-bound RNA from the human genome by defining eight  
112 regions: exons, introns, lincRNAs, snRNAs, rRNAs, miRNAs, tRNAs and intergenics. In Tau-

113 expressing HEK cells, tRNAs were overwhelmingly the highest category of RNA crosslinked to  
114 Tau (Fig. 1d). Endogenous Tau in hiPSC-derived neurons also bound tRNAs; however,  
115 background RNA from introns and intergenics were relatively abundant as well (Fig. 1e).  
116 Background RNA sequences are common in all CLIP studies, particularly for atypical RNA  
117 binding proteins [19]. Despite the abundance of tRNAs in cells however, background reads from  
118 CLIP experiments consistently show a paucity of tRNAs. Correcting for background reads by  
119 dividing the percentage of Tau-bound RNA by the percentage of nucleotides of each category in  
120 the genome demonstrated a selective enrichment of tRNAs (Fig. 1f-g). The specific tRNA  
121 species crosslinked to Tau overlapped extensively between HEK and hiPSC-derived neuron  
122 samples. Of 625 annotated tRNA loci in the human genome, 462 tRNA genes crosslinked to Tau  
123 in HEK cells with 79% of them observed in all four Tau CLIP samples and 94% in at least two  
124 samples. In the hiPSC-derived neurons, all 231 tRNA genes identified were also observed in the  
125 HEK cells and 119 of these were verified in at least two Tau CLIP samples. The distribution of  
126 the cross-linked tRNAs in HEK and hiPSC-derived neurons differed from the distribution of the  
127 total tRNAs. This difference indicated that the tRNAs selected by the CLIP experiment were not  
128 randomly drawn from the total tRNA pool (Fig. S3a-b). Among the most differentially selected  
129 tRNAs by CLIP was tRNA<sup>Arg</sup> (Fig. S3c).

130 PAR-iCLIP can identify the cross-linked sites in the tRNAs. tRNA sequences extend  
131 from the most 3' nucleotide of the tRNA to the covalently cross-linked site where the sequencing  
132 terminates. In both HEK cells and hiPSC-derived neurons, the crosslink site was predominantly  
133 located within the anti-codon loop (Fig. 2a-b, Fig. S4), followed by the T loop and in the D-loop,  
134 both with far smaller frequencies. Overall there was a preference for single-strand segments of  
135 tRNA as crosslink sites.

136

### 137 **Tau-RNA Binding Affinity and Stoichiometry**

138 A gel shift assay using recombinant wild type full-length human Tau (4R2N) induced a  
139 shift in unacetylated tRNA<sup>Lys</sup> (Fig. 3a), yielding a dissociation constant ( $K_d$ ) for 4R2N Tau  
140 binding to tRNA of  $460 \pm 47$  nM (Fig. 3b). The derived Hill coefficient was 2.8, implying  
141 cooperative binding of multiple Tau proteins to tRNA [20]. Isothermal titration calorimetry (ITC)  
142 experiments independently confirmed the affinity of Tau binding to tRNA to yield  $K_d = 735 \pm$   
143  $217$  nM and  $372 \pm 9$  nM for 4R2N and K18 Tau, respectively (Fig. 3c). The dissociation constant  
144 for 4R2N Tau binding to a 43 nucleotide random RNA sequence still yielded a  $K_d = 832 \pm 94$  nM  
145 with a Hill coefficient of 2.6 according to a gel shift assay, suggesting that Tau effectively binds  
146 RNA non-specifically *in vitro*, although there may be differences in binding affinity.

147 Our *in vitro* observation further suggested that Tau binds RNA in two stages, first  
148 forming a protein dimer-RNA ( $P_2R$ ) complex followed by a protein multimer-RNA ( $P_{2n}R$ )  
149 complex, consistent with a two-stage RNA binding model reported for the protein AUF1 [21]  
150 and hnRNP A1 [22]. The ITC titration experiments showed that both 4R2N and K18 Tau interact  
151 with tRNA with the stoichiometry of a protein dimer (Fig. 3c,  $n = 0.52 \pm 0.04$ ), while the gel  
152 shift assay showed multiple bands corresponding to high molecular weight protein-RNA  
153 complexes. These include a faster migrating band representing  $P_2R$  complexes populated at  
154 lower Tau:tRNA molar ratio and a slower migrating band representing  $P_{2n}R$  complexes  
155 populated at higher Tau:tRNA molar ratios (Fig. 3d-e). The fraction of bound Tau (from the low  
156 or high bands) was plotted as a function of Tau:tRNA molar ratios (Fig. 3f), and compared to the  
157 theoretical binding saturation curves for 1:1 to 6:1 binding stoichiometries (Fig. 3f). At lower  
158 Tau:tRNA molar ratios, Tau and RNA form complexes at a  $\sim 2:1$  ratio, while at higher Tau:tRNA

159 molar ratios, Tau and tRNA form complexes at ratios up to 6:1. We conclude that tRNA is  
160 capable of binding multiple Tau proteins in a multi-step process. Judging by the absence of  
161 higher stoichiometric signatures in the ITC measurement that is less sensitive to binding events  
162 associated with small changes in heat, Tau:tRNA complexes that exceed a ratio of 2:1 must rely  
163 on weak interactions.

164

### 165 **Tau phase-separates in the presence of RNA**

166       Mixing of 4R2N or  $\Delta$ tau187 (similar to K18, see Methods section) constructs with tRNA  
167 (25 kDa), poly(A) RNA (66~660 kDa) or poly(U) RNA (800~1000 kDa) reliably produced a  
168 turbid solution under a wide range of Tau:RNA mass ratios and salt concentrations (Fig. 4a-e and  
169 Fig. S5a-e). According to bright-field microscopy (Fig. 4a), droplets formed and phase separated  
170 from the bulk aqueous phase with a clearly visible and highly spherical boundary. Tau droplets  
171 were capable of merging into a single droplet with the complete and nearly instantaneous loss of  
172 any boundary at the fusion interface, indicating that the droplets are fluidic with a relatively low  
173 interfacial tension (a series of snapshots capturing the fusion of two droplets are shown in Fig.  
174 4a). Confocal microscopy images of fluorescence-labeled Tau verify that Tau is exclusively and  
175 homogenously contained within the droplet (Fig. 4b).

176

### 177 **Tau-RNA droplets form a complex coacervate phase**

178       Droplet formation follows from the mixing of two oppositely charged biopolymers at a given  
179 pH—Tau and RNA. Systematic increase in the salt concentration decreased the number of Tau-  
180 RNA droplets that eventually disappeared when the salt concentration was increased to 100 mM  
181 or higher (Fig. 4c-d, Fig. S5a left panel). Droplet formation was maximal at  $\Delta$ tau187:tRNA



182 molar ratios of 8:1,  $\Delta$ tau187:poly(A) RNA molar ratios from 33:1 to 330:1 and  $\Delta$ tau187:poly(U)  
183 RNA ratios from 267:1 to 333:1 (estimated from the molecular weight of RNAs, see Fig. S5c).  
184 Remarkably, each of these stoichiometries converge to a  $\Delta$ tau187:tRNA charge ratio of  $\sim$ 1:1,  
185 irrespective of the RNA type (Fig. 4e, Fig. S5a right panel). Droplet formation was also  
186 observed with full length Tau 4R2N and RNA, but was less robust than with  $\Delta$ tau187, possibly  
187 due to the additional negative charges at the N-terminal segment of Tau 4R2N that would  
188 diminish the electrostatic association between Tau and RNA. However, at pH 6 where the net  
189 charge of Tau 4R2N is similar to  $\Delta$ tau187, droplets reliably formed, though yielding lower  
190 number densities, and were exquisitely sensitive to salt concentration (Fig. S5e). Even at NaCl  
191 concentrations as low as 10 mM, the droplets dissolved. In cellular environments however,  
192 additional factors—charged co-constituents or posttranslational modifications of Tau—may  
193 strengthen Tau-RNA associations, rendering droplet formation more favorable at higher ionic  
194 strengths. Together, these observations show that droplet formation is dominated by electrostatic  
195 complexation between oppositely charged polyelectrolytes, while the shielding of their excess  
196 charge (by the tuning of Tau:RNA ratio) is critical to form an extended assembly constituting the  
197 droplets. From this we conclude that Tau-RNA droplet formation follows a complex  
198 coacervation mechanism, initiated through non-specific complexation of oppositely charged  
199 polyelectrolytes and driven by the further association of these polyelectrolyte complexes to form  
200 a macroscopic fluid phase by relying on weak electrostatic attractions tuned by salt concentration  
201 [23]. A crucial observation is that complex coacervate droplet formation is spontaneous and fully  
202 reversible through the tuning of salt concentration and Tau:RNA ratios. The convergence of  
203 different Tau constructs toward the shared property of complex coacervation with different RNA

204 species present at a common charge ratio of  $\sim 1:1$  leads us conclude that complex coacervate-  
205 driven droplet formation is an intrinsic property of Tau in the presence of RNA.

206

### 207 **Tau in condensed droplets is in a solution state**

208 Within a condensed complex coacervate, held together by non-specific and weak electrostatic  
209 interactions, we expect the polyelectrolyte constituents to maintain their hydration layer and  
210 remain dynamic [14, 24]. To spectroscopically track Tau exclusively from within the condensed  
211 phase we first positively verified by confocal fluorescence imaging that  $\Delta\text{tau}187$  was exclusively  
212 localized within the droplet (Fig. 4b). This allowed us to characterize the droplet-internal protein  
213 properties. First, continuous wave electron paramagnetic resonance (cw EPR) spectral line shape  
214 analysis of singly spin labeled  $\Delta\text{tau}187$  at cysteine site 322,  $\Delta\text{tau}187/322\text{C-SL}$ , diluted with  
215 diamagnetically labeled  $\Delta\text{tau}187/322\text{C-DL}$  (see Methods), was used to compare the protein side  
216 chain dynamics and degrees of freedom of the tethered spin label of  $\Delta\text{tau}187$  in dilute solution  
217 state (Fig. 4 red, f-h), in the droplet state associated with poly(A) RNA (blue, f) and tRNA (green,  
218 g) and upon addition of the Tau aggregation inducer, heparin (black, h). Remarkably, the EPR  
219 lineshape of  $\Delta\text{tau}187/322\text{C-SL}$  within the droplet phase was indistinguishable from the dilute  
220 solution state (Fig. 4f vs. 4g). In contrast, the EPR line shape dramatically broadened within  
221 minutes of adding heparin—a highly effective aggregation inducer of Tau [1, 25] (Fig. 4f vs. 4h).  
222 This finding demonstrates that the condensation of  $\Delta\text{tau}187$  to high protein concentration alone  
223 does not effectively induce dehydration and aggregation of Tau, and that Tau remains dynamic  
224 and hydrated and retains protein dynamical properties as found in solution state, despite forming  
225 long-range associations with RNA in a highly condensed fluid phase.

226 To determine whether Tau assumes altered protein conformations in the complex  
227 coacervate phase compared to the dilute solution phase, we compared the PHF6 and PHF6\*  
228 hexapeptide regions of Tau under these conditions. These regions of the Tau sequence pack into  
229 the  $\beta$ -sheet core once fibrils are formed of Tau [26]. Previously, we identified that both the PHF6  
230 and PHF6\* hexapeptide regions of Tau undergo a dramatic opening from a compact to a fully  
231 extended local conformation within minutes of adding heparin, well before fibril formation is  
232 seen and remain extended as insoluble fibrils are formed (unpublished data). These local distance  
233 measurements of the regions flanking the PHF6(\*) regions offer a powerful tool to compare the  
234 conformational state of Tau in dilute solution, droplet and aggregation-induced states. We  
235 prepared a  $\Delta$ tau187 G272C/S285C-SL<sub>2</sub> construct that was doubly MTSL-labeled at sites 272 and  
236 285 (see Methods) to access the distances across the PHF6\* hexapeptide region by double  
237 electron-electron resonance (DEER) spectroscopy. Surprisingly, the distances flanking the  
238 PHF6\* region remained unchanged from dilute solution state to when Tau was condensed into a  
239 concentrated complex coacervate phase in association with poly(A) RNA and tRNA (Fig. 4i and  
240 j). This contrasts with the effect of heparin on Tau that markedly extended the segment distances  
241 (from ~3 to ~4 nm) between the labels, within minutes of heparin addition, corresponding to the  
242 extended conformation that the PHF6(\*) segment adopts in insoluble fibrils when neatly stacked  
243 in  $\beta$ -sheets (Fig. 4k).

244 Interestingly, we observed a low-level Thioflavin T (ThT) signal under Tau-poly(U)  
245 RNA droplet forming conditions (see Fig. S5f) that gradually increased with time over 12 hours.  
246 This ThT signal was nearly entirely diminished at increased salt concentration at which Tau-  
247 RNA associations are weakened and droplets are resolved. Still, the ThT intensity from the Tau-  
248 RNA droplet samples, even after three days of incubation, was significantly smaller (less than

249 5%) compared to what was observed in the presence of the aggregation-inducing heparin under  
250 similar charge ratio and mass concentration at any incubation time (Fig. S5f). Since ThT  
251 intensity is commonly used as an assay to map  $\beta$ -sheet content, we suggest that droplet formation  
252 through association with RNA increases the aggregation propensity of Tau *in vitro*, even while  
253 the Tau-RNA complexes are held together by fully reversible weak interactions.

254

### 255 **Exogenous tRNA can induce sarkosyl insolubility of Tau**

256 To determine whether Tau-RNA complexes have the potential for pathological  
257 interactions *in vivo*, hiPSC-derived neurons with a P301L mutation or wild type were transfected  
258 with 20U tRNA per 1.2 million cells. Cell lysates (input) were prepared in a high salt/high  
259 sucrose buffer, followed by fractionation in a 1% sarkosyl buffer. Transfection in the absence of  
260 nucleic acids (mock) or addition of tRNA to the mock lysate (mock + tRNA) were used as  
261 controls. Cells transfected with tRNA accumulated sarkosyl insoluble Tau, whereas cells without  
262 added tRNA or when tRNA was added to the lysis buffer did not increase Tau in the insoluble  
263 fractions (Fig. 5). The increase in sarkosyl-insoluble Tau populations occurred in both wild-type  
264 and P301L Tau-containing cells when infected with tRNA.

265

### 266 **Discussion**

267 Tau can bind RNA in two stages, mediated by (i) strong binding at a Tau:RNA molar  
268 ratio of 2:1 with nanomolar dissociation constants and (ii) weak association between Tau  
269 multimers and RNA to form higher order complexes. Although Tau lacks a recognizable RNA-  
270 binding motif, it bound tRNA as its dominant partner *in vivo*. Furthermore, Tau was found to  
271 spontaneously phase separate upon non-specific complexation with RNA into dense protein

272 droplets, whose formation was reversibly and sensitively tunable by salt concentrations, as well  
273 as the Tau:RNA ratios. Crucially, the optimal Tau:RNA molar ratios range from 8:1 to 330:1,  
274 which varies among different RNA species. Remarkably, all higher order complexes converge to  
275 a common Tau:RNA charge ratio of  $\sim 1:1$ , leading us to conclude that Tau-RNA droplet  
276 formation is driven by electrostatic interactions underlying complex coacervation, in which  
277 oppositely charged polyelectrolytes associate into extended assemblies held together by weak  
278 electrostatic interactions and condense to a macroscopic fluid phase [14, 17, 27].

279         Crucially, Tau complexed with RNA in the highly condensed droplet state maintains the  
280 dynamical and conformational signature of free Tau in solution state according to cw EPR and  
281 DEER analysis around the  $\beta$ -sheet forming PHF6(\*) segment of Tau, implying that small  
282 changes in the free energy of Tau accompany its condensation to the droplet phase. At the same  
283 time, a low-level ThT signal was observed from the Tau-RNA droplet samples after extensive  
284 incubation time, though significantly weaker compared to from Tau solutions *en route* to fibrils  
285 as initiated by the addition of heparin. Nevertheless, the implication that Tau droplets have some  
286 propensity toward soluble  $\beta$ -sheet complexes suggests that complexation with RNA under  
287 droplet forming conditions may be on pathway to fibrils. Consistent with this finding, tRNA  
288 increased sarkosyl insolubility of Tau *in vivo*. We conclude that dynamic and free Tau species  
289 are stored in the concentrated droplet state that, on the one hand is predisposed to convert to  
290 fibrils, and on the other hand can spontaneously and reversibly dissolve into solution at increased  
291 salt concentration. This previously unrecognized droplet phase state contrasts with that of Tau  
292 following incubation with the polyanion, heparin, in which an irreversible transformation to  
293 fibrils occurs and a large intra-Tau conformational change is observed in solution state preceding  
294 fibril formation.

295 RNA generally promotes complex coacervation whereas heparin effectively promotes  
296 fibrillization of Tau. The distinguishing effects between RNA (a polyphosphate) and heparin (a  
297 polysulfate) on Tau—coacervation versus fibrillization—may be an operational principle of Tau-  
298 polyanion association. Weak associations between multiples of Tau and RNA is consistent with  
299 the consensus property of a coacervate phase in which the hydration layer of the polyelectrolyte  
300 constituents remains intact, ensuring fluidity of the condensed phase, as well as reversibility  
301 between the dilute and condensed phase [14]. The Tau droplet state fits this biochemical portrait,  
302 so that Tau can reversibly and rapidly switch between the dilute solution and the dense droplet  
303 state, while involving minimal rearrangement of hydration water and protein conformations. The  
304 spontaneous complex coacervation from synthetic polyelectrolyte constituents can be entropy-  
305 driven according to several studies [6, 23, 28-30]. We found that Tau-RNA complex  
306 coacervation was enhanced at elevated temperatures, consistent with an entropy-driven reaction  
307 (data not shown). In fact, the observation of solution state-like protein conformational dynamics  
308 of Tau in the coacervate phase implies that the free energy penalty due to lowering of protein  
309 configurational entropy from protein ordering is minimal in the droplet state, and thus the cost  
310 for an entropy-driven complex coacervation reaction, paid by salt and/or water release, is small.  
311 Given this insight, we conclude that the transformation to insoluble aggregates from Tau droplets  
312 should be energetically more favorable than from dilute solution state, given the elevated protein  
313 concentration in the complex coacervate phase. Along these lines ten Wolde and Frenkel [31]  
314 have proposed that condensed liquid droplets serve as a “metastable crucible” to lower free  
315 energy barriers for crystal nucleation, while the discovery of the involvement of nucleic acids in  
316 coacervation-driven phase separation dates back to 1949 by Bungenberg de Jong [15]. Here, we  
317 identify a new state of Tau in which soluble Tau is reversibly stored in concentrated complex

318 coacervate droplets, readily bioavailable for cellular functions or vulnerable to pathological  
319 aggregation depending on the environmental cues at hand.

320

## 321 Materials and Methods

### 322 Cell culture

323 A total of eight samples were used for PAR-iCLIP studies. Four samples were human embryonic  
324 kidney (HEK 293T) cells that expressed either 4R2N (residues 1-441) wild type *tau* (one  
325 sample), 4R2N *tau* harboring the P301L mutation (one sample), and 4R1N *tau* harboring the  
326 P301L mutation fused to CFP (2 samples). Four samples were neurons derived from human  
327 induced pluripotent stem cells (hiPSCs) obtained by reprogramming dermal fibroblasts with  
328 virally transduced Yamanaka factors [32] that expressed wild type *tau*, two harboring a P301L  
329 *tau* mutation (with and without fused CFP) and one harboring the A152T variant [33, 34]. The  
330 hiPSC lines were karyotyped by Cell Line Genetics. Both wild type and P301L were normal  
331 males (46XY). A152T displayed a balanced three-way translocation of chromosomes 1, 13 and 7,  
332 which most likely occurred during the reprogramming process (46XY, t(1;13;7)  
333 (q31.2;q21;q36.3). Pluripotent cells were maintained in feeder-free conditions and cultured in  
334 BD Matrigel (BD Biosciences) coated six-well plates and fed with mTSER daily (Stemcell  
335 Technologies). Neuroectoderm differentiation utilized dorsomorphin and SB431542 (Sigma-  
336 Aldrich) for a week [35]. When neural-rosettes were clearly observable, the media was gradually  
337 replaced with neuronal induction media containing Knockout DMEM F12 with N2, and  
338 Glutamax 1X supplemented with laminin (Sigma-Aldrich) and maintained for an additional six  
339 days with every other day feeding. Neuro-rosettes were microdissected, and grown as  
340 neurospheres in the neuronal induction media supplemented with B27. Neurons were

341 differentiated from neurospheres by dissociating them into individual cells enzymatically with a  
342 1/1 mixture of 0.25% trypsin / StemPro accutase (Thermo Fisher), and plated on Poly-L-  
343 Ornithin/Laminin coated six well plates at a density of 200,000 cells per well. Neuron  
344 differentiation and maturation were stimulated by the addition of 10 mM each of NT3, BDNF,  
345 and GDNF (Preprotech) to the neuronal growth media containing Neurobasal, N2 supplement,  
346 B27 Supplement and Glutamax. Neurons were fed twice per week by replacing half of the  
347 conditioned media with pre-warmed supplemented fresh media, and underwent maturation for at  
348 least five weeks. SH-SY5Y Neuroblastoma cells were plated as monolayers in DMEM/F12  
349 medium with 10% FBS at  $1 \times 10^6$  per 10 cm dish, and the cells switched to neurobasal medium  
350 the next day and differentiated for seven days using 10  $\mu$ M retinoic acid.

351

### 352 **Antibodies**

353 The Tau antibodies used were Tau-5 (1 mg/ml, Abcam); HJ 8.5 and HJ 9.2 (4.5 mg/ml and 2.8  
354 mg/ml, both HJ antibodies are gifts from Dave Holtzman, Washington University); PHF-1 (gift  
355 from Peter Davis, Albert Einstein College of Medicine), MAP2 antibody (0.3 mg/ml,  
356 Proteintech<sup>TM</sup>); CDK5 rabbit antibody (0.2 mg/ml, Santa Cruz); GFP rabbit antibody (5 mg/ml,  
357 Abcam);  $\beta$ -Actin (Sigma-Aldrich); mouse IgG<sub>1</sub> Alexa 680, (2 mg/ml, Invitrogen); mouse IgG  
358 Alexa 680 (2 mg/ml, Invitrogen); rabbit IgG 800 (1 mg/ml, Odyssey).

359

### 360 **PAR-iCLIP**

361 Cells were treated with 4-thiouridine (4SU) (Sigma-Aldrich) for 1h at a final concentration of  
362 500  $\mu$ M at 37°C, rinsed with ice-cold 1x PBS and irradiated one time with 400 mJ/cm<sup>2</sup> of  
363 365 nm UV light on ice. 4-SU can enhance the cross-linking efficiency especially for proteins in



364 the cytoplasm [36-38]. The cells were centrifuged and the pellet stored at -80°C. The major steps  
365 of PAR-iCLIP are listed in Fig. S6 and detailed in the supporting information. CLIP experiments  
366 require an antibody, which can effectively immunoprecipitate Tau under stringent high salt wash  
367 conditions. HJ 8.5 [39] raised against human Tau efficiently depleted Tau. With a dissociation  
368 constant of 0.3 pM, HJ 8.5 pulled down Tau under the high-stringency purification conditions of  
369 CLIP and remained bound to Tau throughout the procedure. Control experiments with GFP or  
370 CDK5 antibody for the lysate expressing those proteins, or with HJ 8.5 antibody for lysates  
371 without expressing Tau were always done in parallel to rule out false positive binding caused by  
372 the beads. After immunoprecipitation, the cross-linked RNA was radiolabeled, the protein  
373 separated on an SDS-PAGE gel, and transferred to nitrocellulose membrane and blotted. The  
374 RNA-protein complexes from CLIP experiments (Fig. 1a-c) were cut from the blot, and the RNA  
375 extracted followed by reverse transcription for library preparation [36]. The <sup>32</sup>P-labeled RNA  
376 band was run on a polyacrylamide Tris-Borate Urea (TBU) denaturing gel to demonstrate the  
377 confirm the size of the complex.

378

### 379 **Library preparation, deep sequencing and bioinformatics analysis of iCLIP**

380 The iCLIP libraries contained an experimental and a random barcode, which allowed  
381 multiplexing and the removal of PCR duplicates. After the barcodes were introduced, sample and  
382 control from one set of experiments were mixed to remove batch-to-batch variation. Libraries  
383 were sequenced on an Ion Torrent Proton. Fastx collapse from FASTX-Toolkit was used to  
384 collapse reads and filter replicates resulting from the PCR based on the random barcode. Reads  
385 were separated into samples by the barcodes at the 5' ends of reads. The reverse transcription  
386 primers sequences at both ends of the reads were trimmed with Cutadapt [40]. After trimming

387 the barcodes, reads with 18 bps or more were kept and counted as total unique reads, and aligned  
388 to the human genome (hg19) by Bowtie2 [41]. RseQC [42] was used to evaluate the quality of  
389 sequencing and mapping reads. Alignments with scores equal or greater than ten were kept for  
390 downstream analysis. Reads from these RNA pools were clustered by their alignments, and  
391 Pyicos tools [43] were used to identify the significant clusters. Clusters with at least five reads  
392 were retained and considered to contain target sites for RNA-Tau crosslinking. Gene models for  
393 RefSeq mRNAs, tRNAs, rRNAs were downloaded from the UCSC genome browser. miRNAs  
394 were downloaded from miRBase (release 20) and other categories of RNAs were download from  
395 Ensemble (release 73). Cross-link sites were identified as the termination site of the sequencing  
396 based on the iCLIP protocol [44]. Individual tRNA genes from the UCSC genome browser were  
397 predicted by using tRNAscan-SE v.1.23. The secondary structure for each tRNA was obtained  
398 from GtRNAdb (<http://gtrnadb.ucsc.edu/>).

399

#### 400 **Deep sequencing and analyses of small RNA expression in HEK cells and hiPSC-derived** 401 **neurons**

402 Small RNAs were extracted from HEK cells and hiPSC-derived neurons using miRNA isolation  
403 kit (mirVana<sup>TM</sup>). Library preparation was adapted from the Ion RNA-seq v2 (Thermo Fisher)  
404 protocol. cDNAs with size range from 30-100 bp were selected and sequenced. Reads were  
405 aligned to both human genomes and tRNA sequences. When mapping reads to tRNA sequences,  
406 the Bowtie read aligner [45] protocol was used, in which a maximum of two mismatches were  
407 allowed. Reads aligned to tRNAs were counted and analyzed with a custom Perl scripts.

408

#### 409 **Recombinant Tau and Tau fragments**

410 Full length recombinant human 4R2N Tau, N-terminal truncated, microtubule binding domain  
411 containing, K18 Tau (residues 244-372) and  $\Delta$ tau187 (residues 255-441 with a His-tag at the N-  
412 terminus) were used for *in vitro* studies. Methods for expression and purification of all  
413 recombinant Tau variants are detailed in the supplementary text. Two variants of  $\Delta$ tau187 were  
414 prepared via site-direct mutagenesis:  $\Delta$ tau187/322C contains a C291S mutation, leaving only one  
415 cysteine at site 322, and  $\Delta$ tau187G272C/S285C contains C291S, C322S, G272C and S285C  
416 mutations, leaving two cysteines at sites 272 and 285).

417

#### 418 **RNA gel mobility shift assay**

419 The gel shift assay was performed with recombinant full length 4R2N Tau and  
420 chromatographically purified unacetylated yeast tRNA<sup>Lys</sup> (tRNA Probes) in 100 mM sodium  
421 acetate buffer at pH 7.0. The molar concentration of tRNA<sup>Lys</sup> was accurately re-measured with  
422 UV spectrophotometry after base-hydrolyzation to account for the hyperchromic effect from the  
423 secondary and tertiary structure of tRNA [20]. RNA43 was purchased in a kit (Pierce) with the  
424 sequence 5'-CCUGGUUUUUAAGGAGUGUCGCCAGAGUGCCGCGAAUGAAAAA-3' to  
425 represent a random sequence. The hydrolyzed tRNA and RNA43 samples were then quantified  
426 with UV spectrophotometry at 260 nm using an extinction coefficient of  $0.025 (\mu\text{g/ml})^{-1}\text{cm}^{-1}$ . For  
427 the gel shift assay, protein was incubated with tRNA at 37 °C for 10 minutes in the presence of  
428 0.5 mM EDTA, 0.5 mM MgCl<sub>2</sub>, 2 U SUPERase• In™ RNase Inhibitor (Thermo Fisher), 0.01%  
429 IGEPAL CA-630 (Sigma-Aldrich), and then applied to a TBE 8% Polyacrylamide Gel (Thermo  
430 Fisher). After gel separation, tRNA was stained with SYBR Gold II (Thermo Fisher). For  
431 quantitative analysis, the fraction of free and bound tRNA was quantified in ImageJ2 (National  
432 Institute of Health).

433

#### 434 **Isothermal Titration Calorimetry (ITC) experiments**

435 Full length Tau or the K18 Tau were dialyzed overnight into a specified buffer for ITC (20 mM  
436 ammonium acetate, pH 7). tRNA (from Baker's yeast, Sigma-Aldrich) was re-suspended in the  
437 ITC buffer and concentration determined using a Nanodrop 1000 (Thermo Scientific).  
438 Experiments were run on a Nano ITC (TA Instruments), in which 300  $\mu$ M tRNA was titrated (5  
439  $\mu$ l injections) into a 1 ml protein solution of 30  $\mu$ M Tau. Data was analyzed using the  
440 NanoAnalyze v3.6 software (TA Instruments). After subtracting the heat generated by tRNA  
441 titration into empty buffer, the experimental data was fitted with an Independent binding model.  
442 Experiments were repeated in triplicates and standard error of the mean reported.

443

#### 444 **Spin labeling of $\Delta$ tau187**

445 To achieve labeling with paramagnetic or diamagnetic probes, the protein was dissolved in 6 M  
446 guanidinium hydrochloride and labeled overnight at 4°C using a 20-fold molar excess of the spin  
447 label (1-oxy-2,2,5,5-tetramethylpyrroline-3-methyl) methanethiosulfonate (MTSL, Toronto  
448 Research Chemicals) or the diamagnetic analog of MTSL (1-Acetoxy-2,2,5,5-tetramethyl- $\delta$ -3-  
449 pyrroline-3-methyl) methanethiosulfonate (Toronto Research Chemicals). Excess label was  
450 removed using a PD-10 desalting column (GE Healthcare) equilibrated in a 20 mM ammonium  
451 acetate buffer at pH 7.0. The protein was concentrated using a 3 kDa centrifugal filter (Amicon  
452 UFC800396). The final protein concentration was determined by UV-Vis absorption at 274 nm  
453 using an extinction coefficient of 2.8  $\text{cm}^{-1}\text{mM}^{-1}$ , calculated from extinction coefficient of  
454 Tyrosine [46]. The two variants  $\Delta$ tau187/322C and  $\Delta$ tau187G272C/S285C were spin labeled  
455 with paramagnetic MTSL probes at the one or two cysteine sites, and are respectively referred to

456 as  $\Delta\text{tau187/322C-SL}$  and  $\Delta\text{tau187G272C/S285C-SL}_2$ . In order to achieve spin dilution,  
457  $\Delta\text{tau187/322C}$  and  $\Delta\text{tau187G272C/S285C}$  were also labeled with the diamagnetic analogue of  
458 MTSL probes, and are referred to as  $\Delta\text{tau187/322C/322C-DL}$  and  $\Delta\text{tau187G272C/S285C-DL}_2$ .  
459 Images in Fig. 4a-b were taken using 400  $\mu\text{M}$  Tau, 800  $\mu\text{g/ml}$  poly(A) RNA and 30% glycerol in  
460 20 mM ammonium acetate at pH 7.

461

#### 462 **Preparation of Tau-RNA complex coacervate**

463 Droplets were formed in the 20 mM ammonium acetate buffer with NaCl concentration varying  
464 between 0 and 100 mM and glycerol concentration from 0 to 50% v/v. Solutions of  $\Delta\text{tau187}$  or  
465 full length 4R2N Tau was mixed with tRNA (Baker's yeast, Sigma-Aldrich), poly(A) RNA or  
466 poly(U) RNA (Sigma-Aldrich) at varying protein, RNA, NaCl and glycerol concentrations in a  
467 0.6 ml Eppendorf tube. RNAs were weighted out as powder and the mass concentration was  
468 calculated. The Tau:RNA mass ratio, the total concentration of Tau and RNA, as well as the  
469 NaCl salt concentration were optimized to maximize droplet formation, while choosing a total  
470 biopolymer density to avoid overlapping of droplets in the images to simplify the calculation of  
471 droplet coverage. Microscopy images were acquired at 10 minutes after mixing. A concentration  
472 of 19% v/v for the viscogen glycerol was determined to be an optimal concentration to ensure  
473 cryoprotection for DEER measurements carried out at  $\sim 80$  K, while also ensuring maximal  
474 droplet formation at room temperature (Fig. S5b).

475 The charge of a peptide at a given pH was estimated by applying an algorithm adapted from  
476 Innovagen's Peptide Property Calculator (<http://pepcalc.com/>). All residues were assumed to  
477 have pKa values that are equivalent to the isolated residues (CRC Handbook of Chemistry and  
478 Physics, 87th ed). Charges of the C-terminus or N-terminus were estimated as -1 and +1,

479 respectively at both pH 6.0 and pH 7.0. The processing code is made available as supplementary  
480 files on the free web (<https://github.com/yanxianUCSB/PeptideChargeCalculator>).

481

### 482 **Bright-field microscopy of Tau-RNA droplets**

483 Immediately after mixing Tau in a 0.6 ml Eppendorf tube with RNA under droplet forming  
484 conditions (established above) and ensuring thorough mixing, 1  $\mu$ l of this mixture was applied to  
485 a microscope slide that is closed with a cover slide gapped by two layers of double-side sticky  
486 tape to generate a liquid sample region with consistent thickness. The microscope slide was kept  
487 at room temperature for 10 minutes with the cover slide facing down, during which the particles  
488 within the liquid sample region settled down onto the surface of the cover slide. Images were  
489 taken with a 12-bit CCD camera across the entire sample liquid region near the surface of the  
490 cover slide using an inverted compound microscope (Olympus IX70). Before imaging, Köhler  
491 illumination was applied and the focus close to the surface of the cover slide optimized to  
492 enhance the contrast between the dark droplets and the bright background.

493

### 494 **Confocal microscopy of Tau-RNA droplets**

495 For confocal microscopy,  $\Delta$ tau187/322C was fluorescently labeled ( $\Delta$ tau187/322C-FL) with  
496 Alexa Fluor 488 C<sub>5</sub> Maleimide (Thermo Fisher) at the same 322 site as  $\Delta$ tau187/322C-SL. 50  
497  $\mu$ M of  $\Delta$ tau187/322C-FL was mixed with 350  $\mu$ M  $\Delta$ tau187/322C-SL at a 1:7 molar ratio in order  
498 to prevent saturation. 800  $\mu$ g/ml of poly(A) RNA was further added to this Tau solution,  
499 resulting in droplet formation in the 20 mM ammonium acetate buffer and in the presence of 20  
500 mM NaCl. 10  $\mu$ L of the mixture was pipetted and put on a microscope slide with a cover slide

501 gapped by double-sided sticky tape. Confocal images were acquired using a spectral confocal  
502 microscope (Olympus Fluoview 1000).

503

#### 504 **Droplet quantification from image analysis**

505 To quantify the amount of droplet formed under the given experimental condition of interest,  
506 images were taken by a 12-bit CCD camera of an inverted compound microscope (Olympus  
507 IX70), and recorded in TIF format. With illumination and focus optimized, droplets settling on  
508 the cover slide have lower intensity than their surrounding on the images. An image of the 20  
509 mM ammonium acetate buffer was taken to calculate the average intensity to set as threshold in  
510 order to classify different parts of the image into droplets and buffer. For each image, the area of  
511 the droplets was divided by the total area of the image, generating a % droplet coverage value on  
512 the cover slide. Droplets with eccentricity above 0.9 or equivalent diameter below 1  $\mu\text{m}$  were  
513 filtered out in order to reduce false reading. The MATLAB code is made available as  
514 supplementary files on the free web (<https://github.com/yanxianUCSB/DropletAnalysis>).

515

#### 516 **Continuous wave (cw) Electron Paramagnetic Resonance (EPR)**

517 Cw EPR relies on the anisotropy of nitroxide radical's Larmor frequency and hyperfine coupling  
518 that makes its lineshape highly sensitive to the local dynamics, orientation and confinement of a  
519 nitroxide-based spin label tethered to the protein. Cw EPR measurements were carried out with  
520  $\Delta\text{tau}187/322\text{C-SL}$  using a X-band spectrometer operating at 9.8 GHz (EMX, Bruker Biospin)  
521 and a dielectric cavity (ER 4123D, Bruker Biospin). Samples were prepared by either mixing  
522 200  $\mu\text{M}$   $\Delta\text{tau}187/322\text{C-SL}$  with 300  $\mu\text{M}$  unlabeled  $\Delta\text{tau}187/322\text{C}$  (to generate 40% spin labeled  
523 sample) or by using 500  $\mu\text{M}$   $\Delta\text{tau}187/322\text{C-SL}$  (100% labeled). Viscogen was added to the

524 sample to achieve either 19% v/v glycerol (for the droplet samples) or 30% v/v sucrose (for the  
525 aggregated samples) matching the DEER conditions. Tau samples under droplet forming  
526 condition were prepared by adding 1.5 mg/ml RNA, and Tau samples under aggregation-  
527 inducing conditions prepared by adding 125  $\mu$ M heparin (11 kDa average MW, Sigma-Aldrich).  
528 A sample of 3.5  $\mu$ L volume was loaded into a quartz capillary (VitroCom, CV6084) and sealed  
529 at one end with critoseal and the other with beeswax, and then placed in the dielectric cavity for  
530 measurements. Cw EPR spectra were acquired using 2 mW of microwave power, 0.3 gauss  
531 modulation amplitude, 150 gauss sweep width and 25 scans for signal averaging.

532

### 533 **Double Electron Electron Resonance (DEER)**

534 DEER measurements were performed on a Q-band pulsed EPR spectrometer operating at 32  
535 GHz (E580, Bruker Biospin) equipped with a QT2 resonator (measurements done by courtesy of  
536 Bruker Biospin). Samples were prepared by mixing 50  $\mu$ M  $\Delta$ tau187G272C/S285C-SL<sub>2</sub> with 500  
537  $\mu$ M analog-labeled  $\Delta$ tau187G272C/S285C-DL<sub>2</sub> at a 1:10 molar ratio to achieve spin-dilution and  
538 avoid artifacts from unwanted inter-protein spin distances. For DEER, Tau samples under droplet  
539 forming condition were prepared by adding 1.65 mg/ml RNA and ensuring 19% v/v glycerol  
540 concentration, and Tau samples under aggregation-inducing conditions prepared by adding 137.5  
541  $\mu$ M heparin and ensuring 30% v/v sucrose concentration. 40  $\mu$ L samples containing 550  $\mu$ M  
542 concentration of Tau were loaded into a quartz capillary (2.4 mm od x 2 mm id) and flash frozen  
543 in liquid nitrogen after 20 minutes of incubation at room temperature. DEER measurements were  
544 conducted using the dead-time free four-pulse DEER sequence at 80 K, using 22 ns ( $\pi/2$ ) and 44  
545 ns ( $\pi$ ) observe pulses and a 30 ns ( $\pi$ ) pump pulse. The raw DEER data was processed using  
546 Gaussian fitting via DeerAnalysis2013 [47].



547

548 **Quantification of fibril using Thioflavin T assay**

549 18  $\mu$ M  $\Delta$ tau187 was mixed with 100  $\mu$ g/ml poly(U) RNA and incubated at room temperature at  
550 presence of 4  $\mu$ M Thioflavin T for over 3 days with or without additional 100 mM NaCl.

551 Fluorescence at 485 nm was measured via Infinite 200 Pro plate reader (Tecan).

552

553 **Transfer RNA transfection**

554 Neuronal cultures were transfected with 20U of bovine liver tRNA (Sigma-Aldrich) per six well  
555 plate using lipofectamine 2000 transfection reagent (Thermo Fisher) following the  
556 manufacturer's protocol. Control cells were transfected in equal conditions in the absence of  
557 nucleic acid (Mock transfection). Mock transfected cells were lysed as described below, with or  
558 without 20U tRNA added to the lysis buffer.

559

560 **Sarkosyl insoluble Tau isolation and western blotting**

561 Separation of sarkosyl insoluble Tau was done as described in the literature [48, 49]. Briefly,  
562 adherent neuronal cell cultures were lysed with an ice-cold high salt/high sucrose Tris HCl buffer  
563 (0.8 M NaCl, 10% Sucrose, 10 mM Tris HCl pH 7.4) containing a 1X Protease Inhibitor Cocktail,  
564 and a 1X Phosphatase Inhibitor Cocktail. Lysis proceeded at 4°C for 30 min before detachment  
565 with a cell scraper, followed by mechanical dissociation using a micropipette. Immediately  
566 afterwards, the lysates were centrifuged at 4°C 3000 x g for 15 min in a microcentrifuge. The  
567 clear supernatants were collected and sampled (Input). Sodium lauroyl sarcosinate (Sigma-  
568 Aldrich) was then added to the supernatants to a final concentration of 1%, followed by a brief  
569 vortexing. Samples were incubated at 4°C with continuous rocking. Samples were then

570 centrifuged at 4°C for 2 h at 170000 x g in a Beckman Coulter 70.1 Ti rotor. Sarkosyl soluble  
571 supernatants (Sol.) were collected. Sarkosyl insoluble (Ins.) pellets were resuspended in 2X  
572 sample loading buffer (250 mM Tris HCl pH 6.8, 10% Glycerol, 10% SDS, 0.5% bromophenol  
573 blue, 20 mM DTT) and heated to 95°C for 10 min. The previously collected input and the  
574 sarkosyl soluble fractions were diluted with the same sample loading buffer, and heated under  
575 similar conditions. Proteins were separated on a 10% SDS-PAGE, transferred to Nitrocellulose  
576 membranes, and blotted with either PHF-1 or  $\beta$ -actin antibody.

577

#### 578 **Data availability**

579 The data that support the findings of this study are available from the corresponding authors on  
580 request.

581

#### 582 **Acknowledgments**

583 We are grateful to the Tau consortium for financial support to K.S.K. and S.H., D. M. Holtzman,  
584 Washington University School of Medicine for the generous gift of HJ 8.5 antibody and P.  
585 Davies, Albert Einstein College of Medicine for PHF-1 antibody. This work was supported by  
586 the 2011 NIH Director New Innovator Award to S.H and made use of the Material Research  
587 Laboratory (MRL) Central Facilities supported by the National Science Foundation (NSF)  
588 through the Materials Research Science and Engineering Center under Grant DMR 1121053. We  
589 acknowledge the use of the NRI-MCDB Microscopy Facility and the Spectral Laser Scanning  
590 Confocal supported by the Office the Director, National Institutes of Health (NIH) under Award  
591 # S10OD010610. The authors declare no competing financial interests.

592

593

## Figure 1

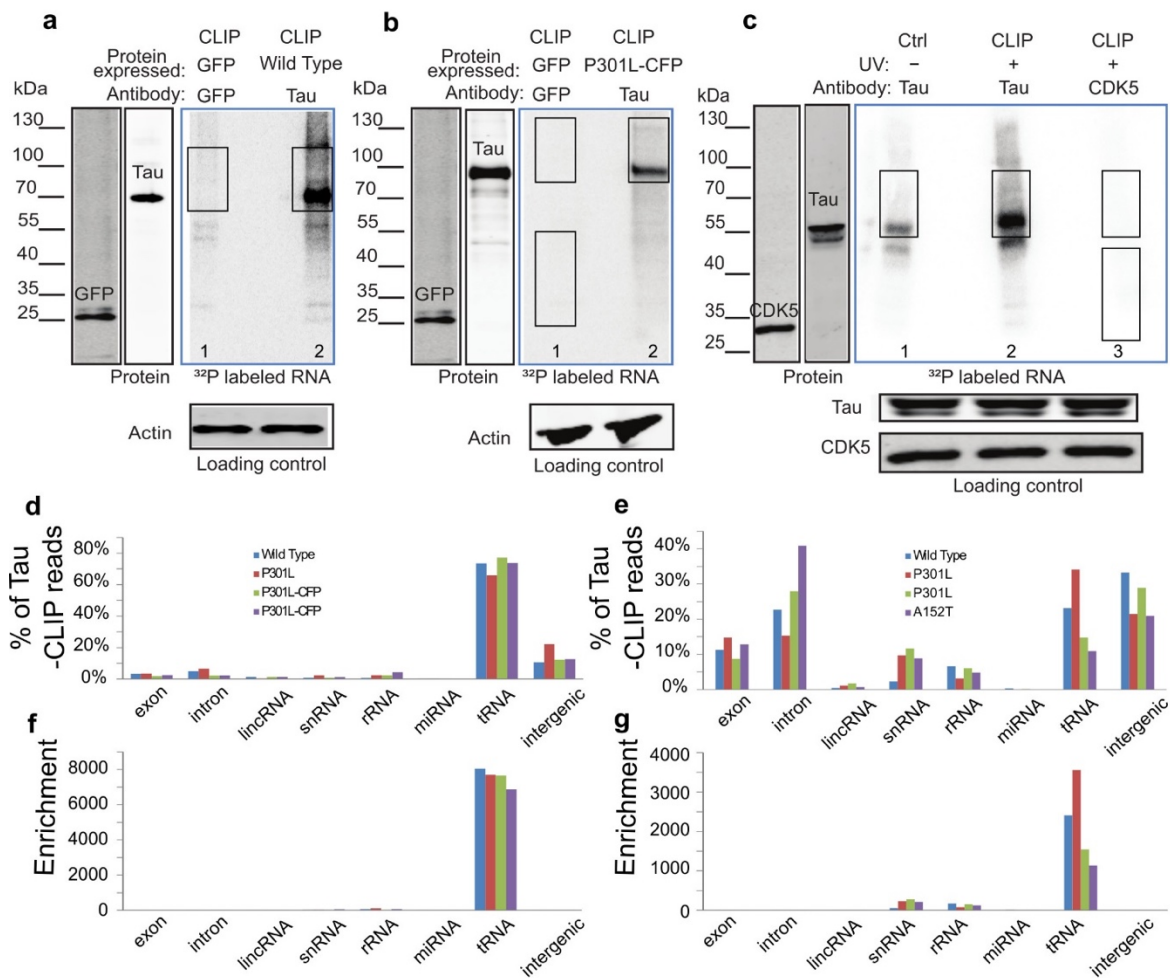

594

595 **Fig. 1: Tau PAR-iCLIP in Tau expressing HEK cells and hiPSC-derived neurons.** Phosphor  
 596 images in the blue frame display crosslinked <sup>32</sup>P-labelled RNA in the nitrocellulose blot. (a-c)  
 597 PAR-iCLIP with wild type Tau (a) or Tau P301L-CFP (b) and endogenous wild type Tau in  
 598 hiPSC-derived neurons (c) (lane 2 in a-c), PAR-iCLIP for GFP (lane 1 in a-b), CDK5 (lane 3 in c)  
 599 and no UV control (lane 1 in c). The antibodies anti-Tau HJ 8.5, anti-GFP and anti-CDK5 were  
 600 used for protein precipitation. No RNase was added. A small RNA signal was visible in the  
 601 absence of cross-linking in hiPSC-derived neurons (lane 1, c), suggesting a small portion of

602 RNA may associate with Tau *in vitro* after cell lysis. The RNA-protein complexes from CLIP  
603 marked by a rectangle was cut from the blot for DNA library preparation. (d-e) % of Tau-CLIP  
604 reads that mapped to eight human genome regions in HEK cells (d) and hiPSC-derived neurons  
605 (e). (f-g) Enrichment of tRNA in Tau-CLIP of HEK cells (f) and hiPSC-derived neurons (g) as  
606 discussed in text.  
607



616  
617

Figure 3

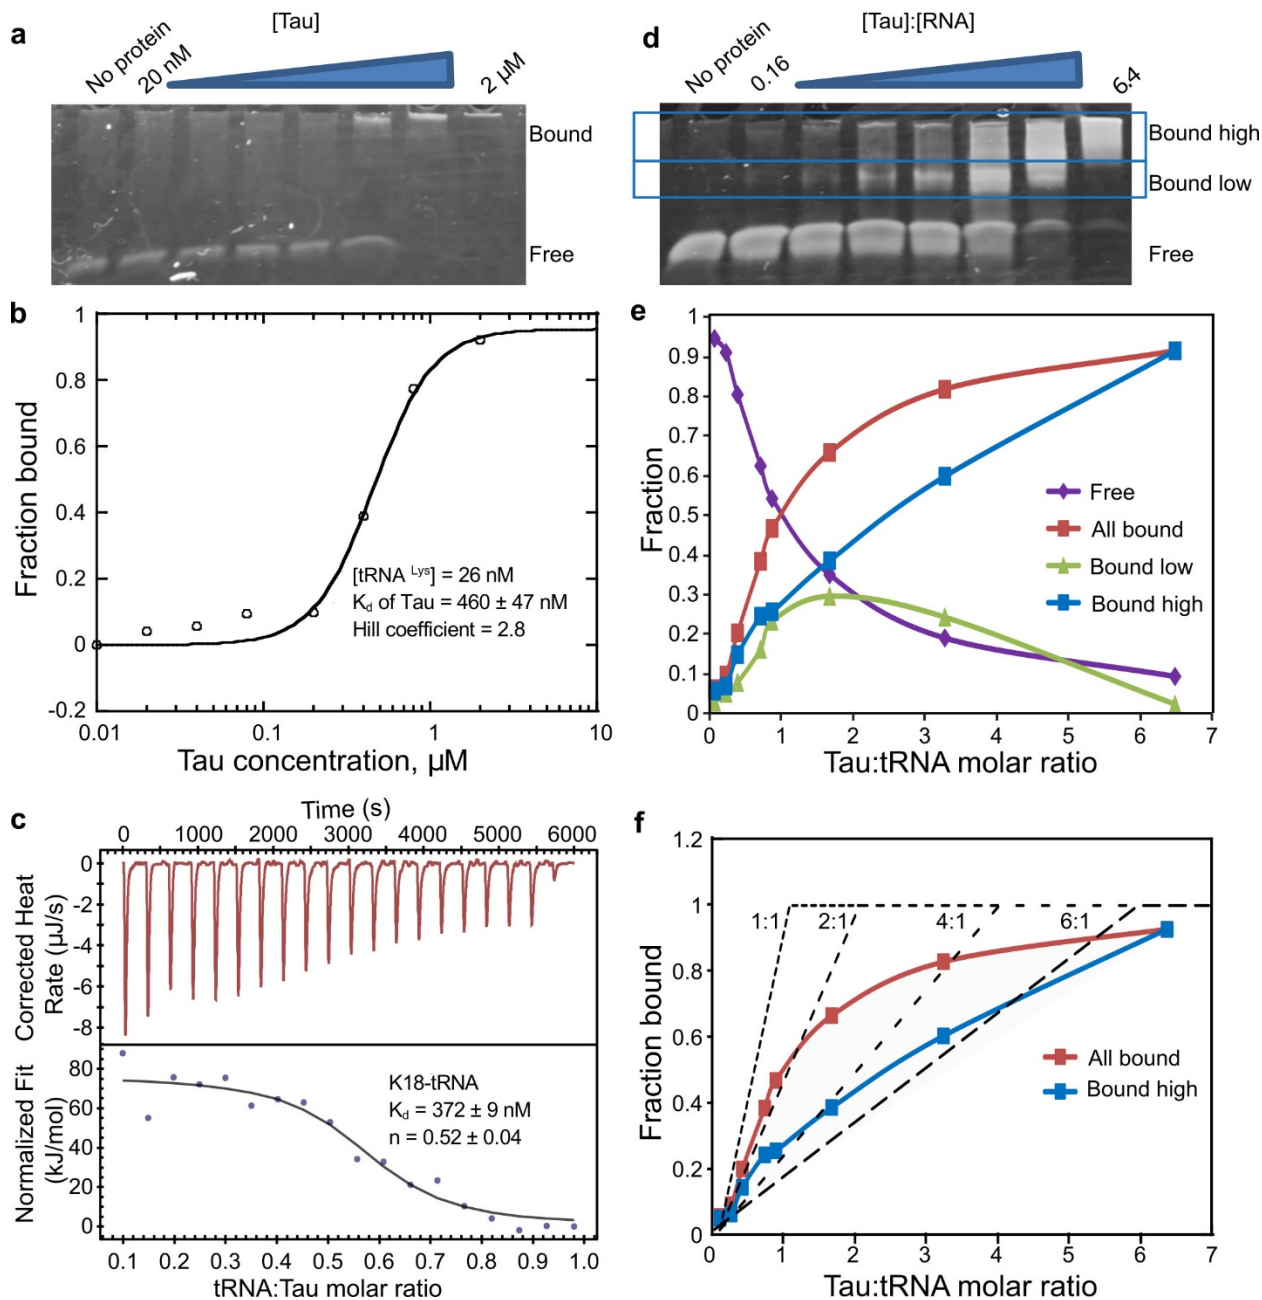

618

619

620 **Fig. 3: Tau tRNA binding by gel shift assay and ITC.** (a) Direct titration experiment shows

621 full length protein Tau induces a mobility shift in tRNA<sup>Lys</sup>. (b) The fraction of bound tRNA

622 plotted as a function of the monomeric Tau concentration and fit to the Hill equation,  $y = 1 / [1 +$

623  $(K_d / x)^n$ . (c) Yeast tRNA was titrated into solutions of K18 Tau in an ITC experiment. The top  
624 panels show the raw incremental-titration. The area under each peak is integrated and plotted  
625 against the molar tRNA:Tau ratio and fitted to an independent binding model (the bottom panel).  
626 (b-c) Standard error of the mean (SEM) is reported, n=3. (d) Stoichiometry shift assay varying  
627 full length protein Tau:RNA molar ratio while tRNA in 2.6  $\mu$ M. (e) Fraction of bound tRNA in d  
628 is plotted over the molar Tau:tRNA ratio. (f) Fraction of bound Tau plotted as a function of  
629 Tau:tRNA molar ratios and compared to the theoretical saturation binding curves (dotted  
630 lines) with 1:1 to 6:1 protein:RNA molar stoichiometry.



Figure 4

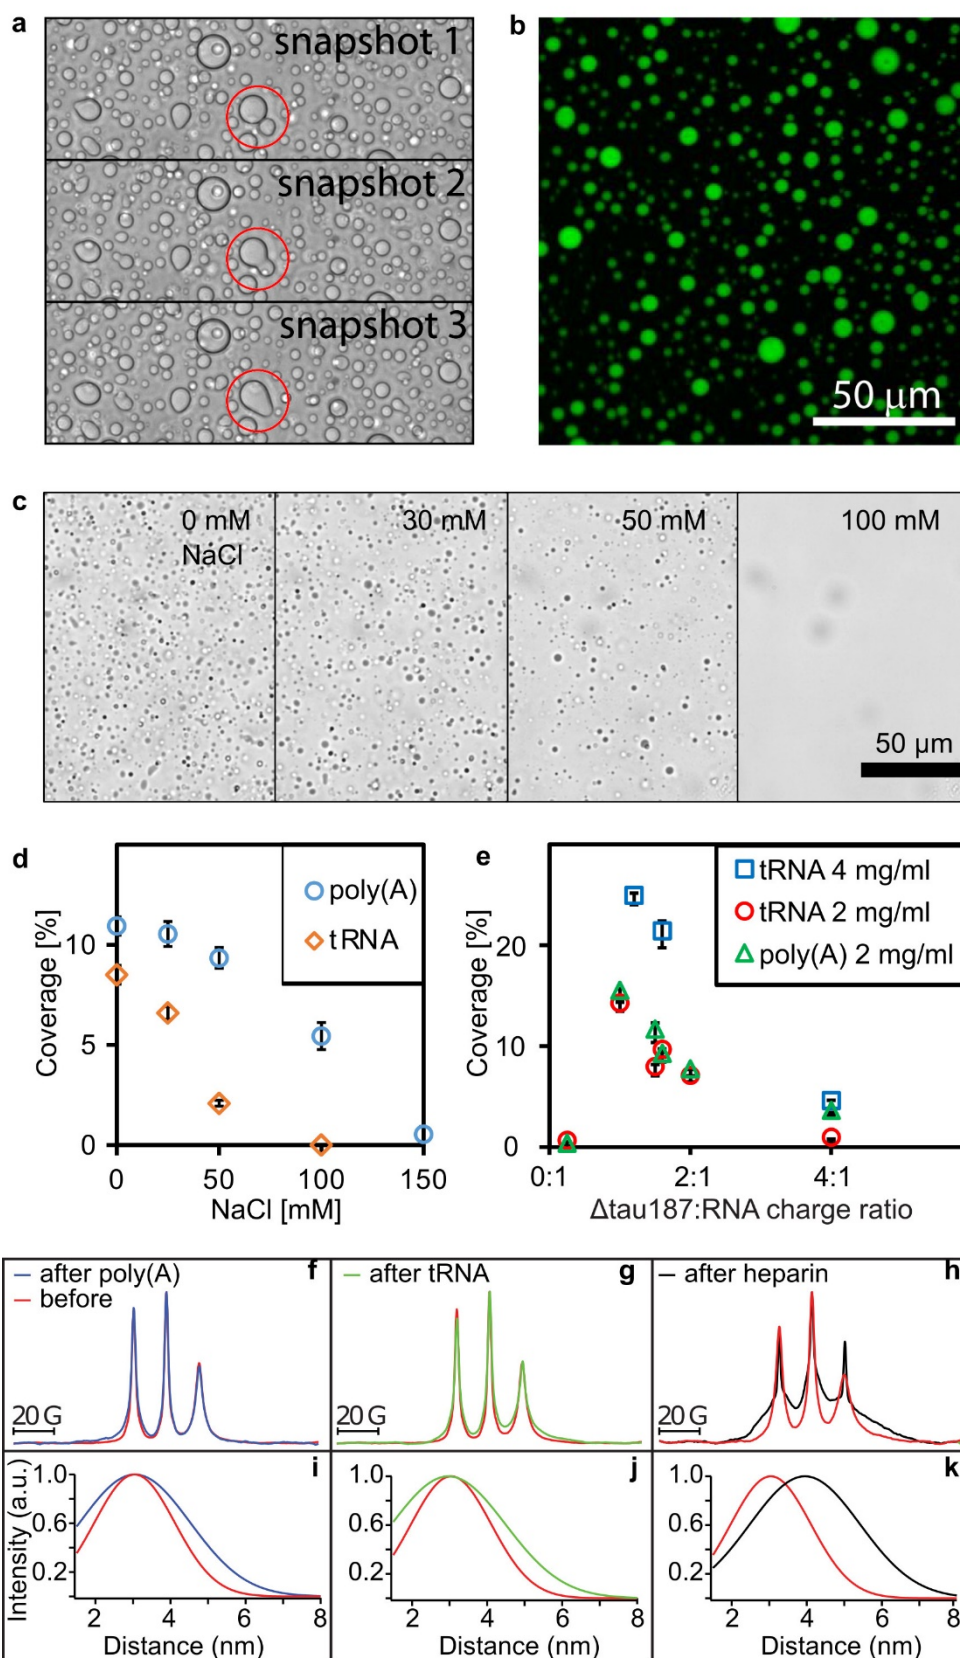

631



632 **Fig. 4: Tau and RNA forms droplet *in vitro*.** (a) Bright field snapshots of droplets from  
633  $\Delta$ tau187 and poly(A) showing two droplets seamlessly fusing (highlighted with red circle). (b)  
634 Confocal microscopy image of  $\Delta$ tau187 labeled with Alexa-488 in the droplets as in (a). c)  
635 Representative bright-field images of Tau-RNA droplet with varying [NaCl]. d) Droplet  
636 coverage with poly(A) or tRNA with varying [NaCl] and e) varying  $\Delta$ tau187: RNA charge ratios.  
637  $\Delta$ tau187:RNA in c-d were maintained at a charge ratio of 1.2:1 and a total mass concentration of  
638 2 mg/ml. Error bars in (d) and (e) represent the standard deviation from n=3. (f-k) CW EPR  
639 spectra obtained at room temperature of  $\Delta$ tau187 in droplets formed with 1.5 mg/ml poly(A)  
640 RNA (f) and 1.5 mg/ml tRNA (g) is unaltered from solution before adding RNA. CW EPR line  
641 shape upon adding 125  $\mu$ M heparin (h) show dramatic line broadening. DEER of  $\Delta$ tau187-SL<sub>2</sub> in  
642 droplets formed with 1.5 mg/ml poly(A) RNA (i) and 1.5 mg/ml tRNA (j), as well as upon  
643 incubation with 137.5  $\mu$ M heparin (k).  
644

644

## Figure 5

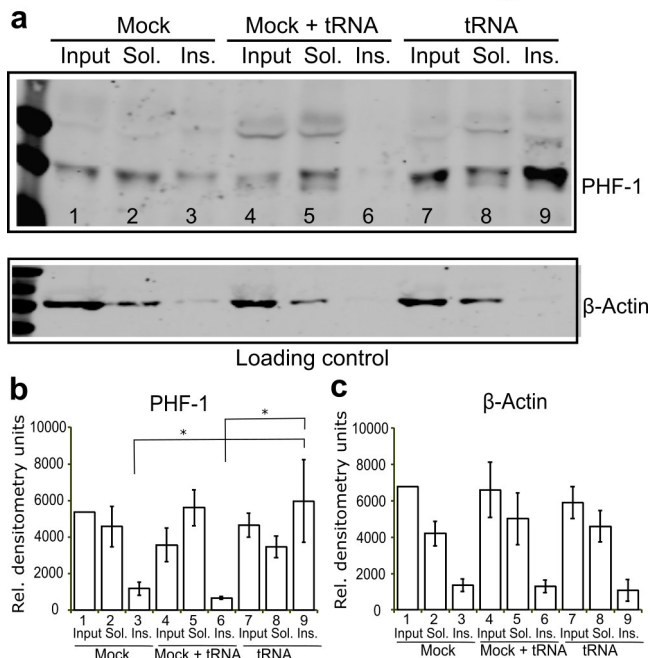

645

646 **Fig. 5: tRNA transfection accumulates sarkosyl insoluble Tau in hiPSC derived neurons.** (a)

647 Cells transfected with tRNA but not cells transfected in the absence of nucleic acids (Mock, lane

648 3) present an evident accumulation of sarkosyl insoluble Tau (tRNA, lane 9). Addition of tRNA

649 to the lysis buffer is insufficient to increase the Tau present in the insoluble fractions (Mock +

650 tRNA, lane 6). (b-c) Quantification of PHF-1 Tau (b) and  $\beta$ -actin (c) level are shown. Error bar

651 represents standard error of the mean. \*  $p < 0.05$ ,  $n=5$ .

652

652

## 653 References

- 654 1. Goedert M, Jakes R, Spillantini MG, Hasegawa M, Smith MJ, Crowther RA. Assembly  
655 of microtubule-associated protein tau into Alzheimer-like filaments induced by sulphated  
656 glycosaminoglycans. *Nature*. 1996;383(6600):550-3.
- 657 2. Kampers T, Friedhoff P, Biernat J, Mandelkow EM, Mandelkow E. RNA stimulates  
658 aggregation of microtubule-associated protein tau into Alzheimer-like paired helical filaments.  
659 *FEBS Letters*. 1996;399(3):344-9. doi: [http://dx.doi.org/10.1016/S0014-5793\(96\)01386-5](http://dx.doi.org/10.1016/S0014-5793(96)01386-5).
- 660 3. Wang X, Wang D, Zhao J, Qu M, Zhou X, He H, et al. The Proline-Rich Domain and the  
661 Microtubule Binding Domain of Protein Tau acting as RNA Binding Domains. *Protein &  
662 Peptide Letters*. 2006;13:679-85.
- 663 4. Sanders David W, Kaufman Sarah K, DeVos Sarah L, Sharma Apurwa M, Mirbaha H, Li  
664 A, et al. Distinct Tau Prion Strains Propagate in Cells and Mice and Define Different  
665 Tauopathies. *Neuron*. 2014;82(6):1271-88. doi: <http://dx.doi.org/10.1016/j.neuron.2014.04.047>.
- 666 5. Goedert M. Alzheimer's and Parkinson's diseases: The prion concept in relation to  
667 assembled A $\beta$ , tau, and  $\alpha$ -synuclein. *Science*. 2015;349(6248):1255555. doi:  
668 10.1126/science.1255555. PubMed PMID: 26250687.
- 669 6. Patel A, Lee Hyun O, Jawerth L, Maharana S, Jahnel M, Hein Marco Y, et al. A Liquid-  
670 to-Solid Phase Transition of the ALS Protein FUS Accelerated by Disease Mutation. *Cell*.  
671 2015;162(5):1066-77. doi: 10.1016/j.cell.2015.07.047.
- 672 7. Kato M, Han TW, Xie S, Shi K, Du X, Wu LC, et al. Cell-free formation of RNA  
673 granules: Low complexity sequence domains form dynamic fibers within hydrogels. *Cell*.  
674 2012;149(4):753-67. doi: 10.1016/j.cell.2012.04.017.
- 675 8. Lee K-H, Zhang P, Kim Hong J, Mitrea DM, Sarkar M, Freibaum BD, et al. C9orf72  
676 Dipeptide Repeats Impair the Assembly, Dynamics, and Function of Membrane-Less Organelles.  
677 *Cell*. 2016;167(3):774-88.e17. doi: <http://dx.doi.org/10.1016/j.cell.2016.10.002>.
- 678 9. Lin Y, Mori E, Kato M, Xiang S, Wu L, Kwon I, et al. Toxic PR Poly-Dipeptides  
679 Encoded by the C9orf72 Repeat Expansion Target LC Domain Polymers. *Cell*. 2016;167(3):789-  
680 802.e12. doi: <http://dx.doi.org/10.1016/j.cell.2016.10.003>.
- 681 10. Molliex A, Temirov J, Lee J, Coughlin M, Kanagaraj Anderson P, Kim Hong J, et al.  
682 Phase Separation by Low Complexity Domains Promotes Stress Granule Assembly and Drives  
683 Pathological Fibrillization. *Cell*. 2015;163(1):123-33. doi:  
684 <http://dx.doi.org/10.1016/j.cell.2015.09.015>.
- 685 11. Kim HJ, Kim NC, Wang YD, Scarborough EA, Moore J, Diaz Z, et al. Mutations in  
686 prion-like domains in hnRNPA2B1 and hnRNPA1 cause multisystem proteinopathy and ALS.  
687 *Nature*. 2013;495(7442):467-73. doi: 10.1038/nature11922.
- 688 12. Pak Chi W, Kosno M, Holehouse Alex S, Padrick Shae B, Mittal A, Ali R, et al.  
689 Sequence Determinants of Intracellular Phase Separation by Complex Coacervation of a  
690 Disordered Protein. *Molecular Cell*. 2016;63(1):72-85. doi:  
691 <http://dx.doi.org/10.1016/j.molcel.2016.05.042>.
- 692 13. Jho Y, Yoo HY, Lin Y, Han S, Hwang DS. Molecular and structural basis of low  
693 interfacial energy of complex coacervates in water. *Advances in Colloid and Interface Science*.  
694 2016. doi: <http://dx.doi.org/10.1016/j.cis.2016.07.003>.

- 695 14. Huang K-Y, Yoo HY, Jho Y, Han S, Hwang DS. Bicontinuous Fluid Structure with Low  
696 Cohesive Energy: Molecular Basis for Exceptionally Low Interfacial Tension of Complex  
697 Coacervate Fluids. *ACS Nano*. 2016;10(5):5051-62. doi: 10.1021/acsnano.5b07787.
- 698 15. Bungenberg de Jong HG. *Colloid Science*. In: Kruyt HR, editor. II. Amsterdam: Elsevier  
699 Publishing Co. Inc; 1949. p. 335-432.
- 700 16. Hwang DS, Zeng H, Srivastava A, Krogstad DV, Tirrell M, Israelachvili JN, et al.  
701 Viscosity and interfacial properties in a mussel-inspired adhesive coacervate. *Soft Matter*.  
702 2010;6(14):3232-6. doi: 10.1039/C002632H.
- 703 17. Overbeek JT, Voorn MJ. Phase separation in polyelectrolyte solutions; theory of  
704 complex coacervation. *J Cell Physiol Suppl*. 1957;49(Suppl 1):7-22; discussion, -6. PubMed  
705 PMID: 13449108.
- 706 18. Dehmelt L, Halpain S. The MAP2/Tau family of microtubule-associated proteins.  
707 *Genome Biol*. 2005;6(1):204.
- 708 19. Friedersdorf M, Keene J. Advancing the functional utility of PAR-CLIP by quantifying  
709 background binding to mRNAs and lncRNAs. *Genome Biology*. 2014;15(1):R2.
- 710 20. Ryder SP, Recht MI, Williamson JR. Quantitative analysis of protein-RNA interactions  
711 by gel mobility shift. *Methods in molecular biology (Clifton, NJ)*. 2008;488:99-115. doi:  
712 10.1007/978-1-60327-475-3\_7. PubMed PMID: PMC2928675.
- 713 21. Zucconi BE, Ballin JD, Brewer BY, Ross CR, Huang J, Toth EA, et al. Alternatively  
714 Expressed Domains of AU-rich Element RNA-binding Protein 1 (AUF1) Regulate RNA-binding  
715 Affinity, RNA-induced Protein Oligomerization, and the Local Conformation of Bound RNA  
716 Ligands. *Journal of Biological Chemistry*. 2010;285(50):39127-39.
- 717 22. Okunola HL, Krainer AR. Cooperative-Binding and Splicing-Repressive Properties of  
718 hnRNP A1. *Molecular and Cellular Biology*. 2009;29(20):5620-31.
- 719 23. Aumiller WM, Pir-Cakmak F, Davis BW, Keating CD. RNA-based coacervates as a  
720 model for membraneless organelles: Formation, properties, and interfacial liposome assembly.  
721 *Langmuir*. 2016. doi: 10.1021/acs.langmuir.6b02499.
- 722 24. Ortony JH, Hwang DS, Franck JM, Waite JH, Han S. Asymmetric Collapse in  
723 Biomimetic Complex Coacervates Revealed by Local Polymer and Water Dynamics.  
724 *Biomacromolecules*. 2013;14(5):1395-402. doi: 10.1021/bm4000579.
- 725 25. Pérez M, Valpuesta JM, Medina M, Montejo de Garcini E, Avila J. Polymerization of  $\tau$   
726 into Filaments in the Presence of Heparin: The Minimal Sequence Required for  $\tau$  -  $\tau$  Interaction.  
727 *Journal of Neurochemistry*. 1996;67(3):1183-90. doi: 10.1046/j.1471-4159.1996.67031183.x.
- 728 26. von Bergen M, Barghorn S, Biernat J, Mandelkow E-M, Mandelkow E. Tau aggregation  
729 is driven by a transition from random coil to beta sheet structure. *Biochimica et Biophysica Acta*  
730 (BBA) - Molecular Basis of Disease. 2005;1739(2-3):158-66. doi:  
731 <http://dx.doi.org/10.1016/j.bbadis.2004.09.010>.
- 732 27. Qin J, Priftis D, Farina R, Perry SL, Leon L, Whitmer J, et al. Interfacial Tension of  
733 Polyelectrolyte Complex Coacervate Phases. *ACS Macro Letters*. 2014;3(6):565-8. doi:  
734 10.1021/mz500190w.
- 735 28. Priftis D, Megley K, Laugel N, Tirrell M. Complex coacervation of poly(ethylene-  
736 imine)/polypeptide aqueous solutions: Thermodynamic and rheological characterization. *Journal*  
737 *of Colloid and Interface Science*. 2013;398:39-50. doi:  
738 <http://dx.doi.org/10.1016/j.jcis.2013.01.055>.

- 739 29. Aberkane L, Jasniewski J, Gaiani C, Scher J, Sanchez C. Thermodynamic  
740 Characterization of Acacia Gum- $\beta$ -Lactoglobulin Complex Coacervation. *Langmuir*.  
741 2010;26(15):12523-33. doi: 10.1021/la100705d.
- 742 30. Xu AY, Melton LD, Jameson GB, Williams MAK, McGillivray DJ. Structural  
743 mechanism of complex assemblies: characterisation of beta-lactoglobulin and pectin interactions.  
744 *Soft Matter*. 2015;11(34):6790-9. doi: 10.1039/C5SM01378J.
- 745 31. Wolde PRt, Frenkel D. Enhancement of Protein Crystal Nucleation by Critical Density  
746 Fluctuations. *Science*. 1997;277(5334):1975.
- 747 32. Takahashi K, Yamanaka S. Induction of Pluripotent Stem Cells from Mouse Embryonic  
748 and Adult Fibroblast Cultures by Defined Factors. *Cell*. 126(4):663-76. doi:  
749 10.1016/j.cell.2006.07.024.
- 750 33. Coppola G, Chinnathambi S, Lee JJ, Dombroski BA, Baker MC, Soto-Ortolaza AI, et al.  
751 Evidence for a role of the rare p.A152T variant in MAPT in increasing the risk for FTD-  
752 spectrum and Alzheimer's diseases. *Human Molecular Genetics*. 2012;21(15):3500-12.
- 753 34. Fong H, Wang C, Knoferle J, Walker D, Balestra Maureen E, Tong Leslie M, et al.  
754 Genetic Correction of Tauopathy Phenotypes in Neurons Derived from Human Induced  
755 Pluripotent Stem Cells. *Stem Cell Reports*. 2013;1(3):226-34. doi: 10.1016/j.stemcr.2013.08.001.  
756 PubMed PMID: PMC3849235.
- 757 35. Mak SK, Huang YA, Iranmanesh S, Vangipuram M, Sundararajan R, Nguyen L, et al.  
758 Small molecules greatly improve conversion of human-induced pluripotent stem cells to the  
759 neuronal lineage. *Stem Cells Int*. 2012;2012:140427. doi: 10.1155/2012/140427. PubMed PMID:  
760 22567022; PubMed Central PMCID: PMCPMC3339118.
- 761 36. Huppertz I, Attig J, D'Ambrogio A, Easton LE, Sibley CR, Sugimoto Y, et al. iCLIP:  
762 Protein-RNA interactions at nucleotide resolution. *Methods*. 2014;65(3):274-87. doi:  
763 <http://dx.doi.org/10.1016/j.ymeth.2013.10.011>.
- 764 37. Tollervey JR, Curk T, Rogelj B, Briese M, Cereda M, Kayikci M, et al. Characterizing  
765 the RNA targets and position-dependent splicing regulation by TDP-43. *Nat Neurosci*.  
766 2011;14(4):452-8. doi:  
767 <http://www.nature.com/neuro/journal/v14/n4/abs/nn.2778.html#supplementary-information>.
- 768 38. Hafner M, Landthaler M, Burger L, Khorshid M, Hausser J, Berninger P, et al.  
769 Transcriptome-wide identification of RNA-binding protein and microRNA target sites by PAR-  
770 CLIP. *Cell*. 2010;141(1):129-41. doi: 10.1016/j.cell.2010.03.009. PubMed PMID: 20371350;  
771 PubMed Central PMCID: PMC2861495.
- 772 39. Yanamandra K, Kfoury N, Jiang H, Mahan TE, Ma S, Maloney SE, et al. Anti-tau  
773 antibodies that block tau aggregate seeding in vitro markedly decrease pathology and improve  
774 cognition in vivo. *Neuron*. 2013;80(2):402-14. doi: 10.1016/j.neuron.2013.07.046. PubMed  
775 PMID: PMC3924573.
- 776 40. Martin M. Cutadapt removes adapter sequences from high-throughput sequencing reads.  
777 *EMBnet journal*. 2011;17(1):10-2.
- 778 41. Langmead B, Salzberg SL. Fast gapped-read alignment with Bowtie 2. *Nat Meth*.  
779 2012;9(4):357-9. doi: 10.1038/nmeth.1923  
780 <http://www.nature.com/nmeth/journal/v9/n4/abs/nmeth.1923.html#supplementary-information>.
- 781 42. Wang L, Wang S, Li W. RSeQC: quality control of RNA-seq experiments.  
782 *Bioinformatics*. 2012;28(16):2184-5. doi: 10.1093/bioinformatics/bts356.

- 783 43. Althammer S, González-Vallinas J, Ballaré C, Beato M, Eyras E. Pyicos: a versatile  
784 toolkit for the analysis of high-throughput sequencing data. *Bioinformatics*. 2011;27(24):3333-  
785 40.
- 786 44. König J, Zarnack K, Rot G, Curk T, Kayikci M, Zupan B, et al. iCLIP reveals the  
787 function of hnRNP particles in splicing at individual nucleotide resolution. *Nat Struct Mol Biol*.  
788 2010;17(7):909-15. doi:  
789 <http://www.nature.com/nsmb/journal/v17/n7/abs/nsmb.1838.html#supplementary-information>.
- 790 45. Langmead B, Trapnell C, Pop M, Salzberg S. Ultrafast and memory-efficient alignment  
791 of short DNA sequences to the human genome. *Genome Biology*. 2009;10(3):R25.
- 792 46. Fasman GD, editor. *Handbook of Biochemistry and Molecular Biology*. 3rd ed.  
793 Cleveland, OH.: CRC Press; 1976.
- 794 47. Jeschke G, Chechik V, Ionita P, Godt A, Zimmermann H, Banham J, et al.  
795 DeerAnalysis2006—a comprehensive software package for analyzing pulsed ELDOR data.  
796 *Applied Magnetic Resonance*. 2006;30(3):473-98. doi: 10.1007/BF03166213.
- 797 48. DeTure M, Ko L-w, Easson C, Yen S-H. tau Assembly in Inducible Transfectants  
798 Expressing Wild-Type or FTDP-17 tau. *The American Journal of Pathology*. 2002;161(5):1711-  
799 22. PubMed PMID: PMC1850799.
- 800 49. Carrettiero DC, Hernandez I, Neveu P, Papagiannakopoulos T, Kosik KS. The Co-  
801 chaperone BAG2 Sweeps PHF Insoluble Tau from the Microtubule. *Journal of Neuroscience*.  
802 2009;29(7):2151-61. doi: 10.1523/JNEUROSCI.4660-08.2009. PubMed PMID: PMC2768429.

803
